# Supplementary material for: Organizational Conflict: Causes and Manifestations.
Source: Royal Society of Chemistry journal article supplement (doi:10.1039/d2ra05603h), 1979-01-01
Supplement: d2ra05603h1.pdf [file d2ra05603h1.pdf]

### Supplementary information:

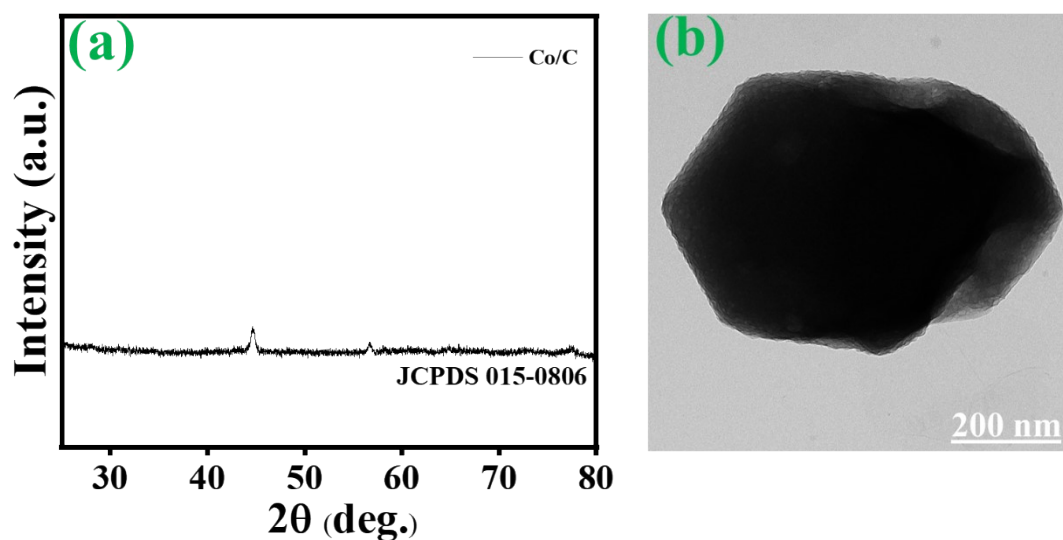

Fig. S1. (a) XRD pattern of intermediate Co/C. (b) TEM image obtained for Co/C.

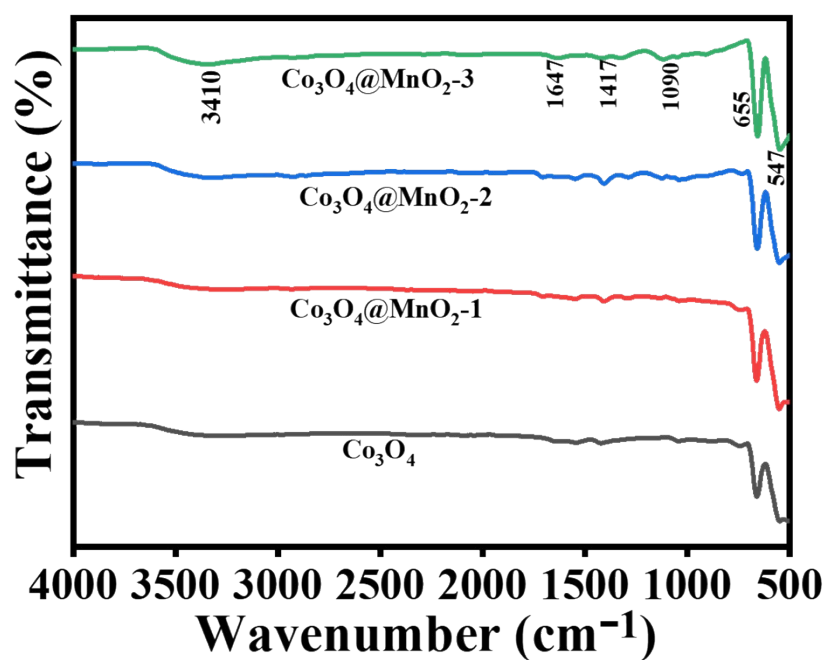

Fig. S2. FTIR analysis of  $\text{Co}_3\text{O}_4$ ,  $\text{Co}_3\text{O}_4@MnO_2-1$ ,  $\text{Co}_3\text{O}_4@MnO_2-2$  and  $\text{Co}_3\text{O}_4@MnO_2-3$

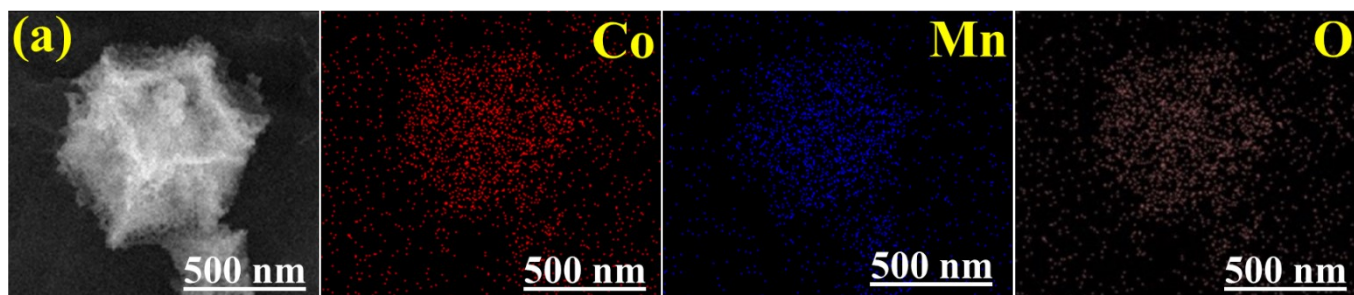

Fig. S3. Elemental mapping of  $\text{Co}_3\text{O}_4@\text{MnO}_2\text{-3}$
